# Supplementary material for: MicroRNA composition of plasma extracellular vesicles: a harbinger of late cardiotoxicity of doxorubicin
Source: Mol Med. 2022 Dec 14;28:156. doi: 10.1186/s10020-022-00588-0 (PMC9753431; doi:10.1186/s10020-022-00588-0)
Supplement: Supplementary file 6 — Additional file 6. Full list of hallmarks for differentially expressed miRNAs and for miRNAs that are differentially distributed. [file 10020_2022_588_MOESM6_ESM.xlsx]

## Sheet: Supplement6_new
Cluster	ID	GeneRatio	BgRatio	pvalue	p.adjust	qvalue	geneID	Count
Plasma up	UV RESPONSE DN	114/2813	144/4383	5.47654e-05	0.00273827	0.00201767	ATRX/FBLN5/ATP2B1/CDON/AGGF1/SNAI2/DYRK1A/PTGFR/COL1A1/MAP1B/MAGI2/CDK13/SMAD3/DDAH1/AMPH/NRP1/ATRN/CDC42BPA/BCKDHB/NFKB1/PMP22/PRKCE/CELF2/ZMIZ1/ITGB3/IGF1R/LAMC1/PIK3R3/SMAD7/MGLL/IGFBP5/NFIB/CAV1/PDLIM5/RXRA/SPOP/NOTCH2/SRI/SERPINE1/TENT4A/MTA1/NR1D2/PRDM2/ARHGEF9/PTPN21/ATP2B4/KALRN/BDNF/ATXN1/SLC7A1/VAV2/SDC2/COL3A1/ACVR2A/CAP2/APBB2/PEX14/PTEN/PRKCA/PDGFRB/AKT3/DLG1/WDR37/TGFBR3/TGFBR2/ATP2…	114
Plasma up	APICAL JUNCTION	150/2813	200/4383	0.00054183	0.0100487	0.00740433	PFN1/CDSN/MSN/VASP/RASA1/PCDH1/CADM3/WNK4/MMP2/CD209/THBS3/CLDN15/VWF/ZYX/ADRA1B/ATP1A3/GRB7/CTNND1/MAP3K20/NECTIN1/FBN1/CLDN7/CD276/EGFR/LDLRAP1/CLDN19/GNAI2/NF2/MYH9/RHOF/NLGN2/NFASC/DSC3/AKT2/MADCAM1/CD34/SPEG/TSC1/ITGA2/GTF2F1/THY1/CLDN18/JUP/PIK3R3/WASL/NRXN2/NEXN/RRAS/AMH/B4GALT1/MDK/ITGA3/SIRPA/PLCG1/CLDN6/BAIAP2/RAC2/CDH1/TAOK2/SRC/ARHGEF6/FSCN1/PECAM1/CALB2/SORBS3/NLGN3/NF1/VAV2/CRB3/SKA…	150
Plasma up	NOTCH SIGNALING	29/2813	32/4383	0.000686709	0.0100487	0.00740433	PPARD/APH1A/NOTCH3/FZD5/FZD1/HEYL/FZD7/FBXW11/NOTCH1/NOTCH2/ARRB1/CCND1/DTX1/PRKCA/PSENEN/KAT2A/WNT5A/MAML2/TCF7L2/JAG1/CUL1/ST3GAL6/WNT2/SKP1/DTX4/RBX1/HES1/DLL1/LFNG	29
Plasma up	HEDGEHOG SIGNALING	32/2813	36/4383	0.000803899	0.0100487	0.00740433	RASA1/PML/LDB1/NRP1/ACHE/MYH9/OPHN1/CNTFR/THY1/CDK6/AMOT/TLE3/PTCH1/ADGRG1/RTN1/NF1/NRP2/L1CAM/CELSR1/SHH/NKX6-1/DPYSL2/VLDLR/CDK5R1/HEY1/GLI1/VEGFA/ETS2/HEY2/SLIT1/UNC5C/CRMP1	32
Plasma up	G2M CHECKPOINT	148/2813	200/4383	0.00159293	0.0155635	0.0114679	ATRX/GSPT1/G3BP1/CDC27/HNRNPD/EGF/GINS2/PML/FOXN3/ODC1/RASAL2/ESPL1/HOXC10/SMAD3/CCNF/MAP3K20/MCM5/TPX2/SMARCC1/HMGA1/TOP2A/SUV39H1/HUS1/SMC1A/CENPA/KIF2C/RBM14/ABL1/NUMA1/EZH2/TLE3/EFNA5/BCL3/SRSF1/SLC7A5/PRPF4B/MARCKS/NUP50/NOTCH2/SFPQ/HNRNPU/MYBL2/H2AX/TENT4A/CUL5/E2F2/CDC25B/KMT5A/FANCC/PLK1/SLC7A1/SLC12A2/HMGB3/E2F1/CUL3/CCND1/CDK4/INCENP/ILF3/NSD2/TNPO2/STMN1/SRSF10/NUP98/E2F4/PRIM2/PRC1/KN…	148
Plasma up	MITOTIC SPINDLE	147/2813	199/4383	0.00186762	0.0155635	0.0114679	FGD4/FLNA/APC/CEP72/CDC27/RASA1/MID1/CNTROB/GSN/ITSN1/RASAL2/ESPL1/ARHGAP4/CYTH2/ARHGAP27/ARHGDIA/ARHGEF7/AKAP13/CLIP2/CDC42EP4/CDC42BPA/PCGF5/SYNPO/KIF3C/TPX2/LATS1/YWHAE/CLASP1/ARL8A/MYH9/RHOF/FLNB/KIF1B/EPB41/TOP2A/ARHGEF2/OPHN1/TSC1/PXN/SMC1A/WASL/KIF2C/MARK4/KIF3B/PDLIM5/ABL1/NUMA1/SPTBN1/SPTAN1/TRIO/SEPTIN9/MARCKS/ARHGAP29/FGD6/DST/NOTCH2/PKD2/RABGAP1/ARHGAP10/TAOK2/BCL2L11/FSCN1/CCDC88A/PL…	147
Plasma up	ANDROGEN RESPONSE	77/2813	100/4383	0.00375929	0.0268521	0.0197857	B2M/ABCC4/PA2G4/ARID5B/PTK2B/NDRG1/FKBP5/TMPRSS2/SLC26A2/STK39/ZMIZ1/TPD52/ABHD2/IQGAP2/CENPN/CDK6/NKX3-1/PDLIM5/GPD1L/MAF/PMEPA1/B4GALT1/VAPA/CCND3/SCD/DHCR24/PTPN21/SRF/FADS1/UBE2J1/CDC14B/APPBP2/CCND1/RPS6KA3/TSC22D1/SPDEF/UBE2I/SGK1/MYL12A/HMGCR/LMAN1/GUCY1A1/SEC24D/SRP19/INPP4B/ACSL3/LIFR/ELK4/DNAJB9/ANKH/PLPP1/ZBTB10/HMGCS1/PIAS1/NGLY1/SLC38A2/KRT19/KLK3/CAMKK2/KLK2/H1-0/SORD/PGM3/SELENOP/A…	77
Plasma down	TNFA SIGNALING VIA NFKB	198/4019	200/4383	3.85757e-06	0.000192879	0.000166485	PDLIM5/MAFF/TNIP1/CEBPB/TRAF1/DDX58/SIK1/CXCL1/MAP3K8/SNN/CXCL2/CLCF1/FOSB/MARCKS/DUSP4/NFAT5/NR4A3/CD44/KLF10/NFKB1/BCL6/TANK/BTG1/BHLHE40/GEM/CCNL1/JUN/HBEGF/PTGER4/NAMPT/TIPARP/CCN1/PFKFB3/EHD1/CDKN1A/DENND5A/SERPINB8/FUT4/NINJ1/CEBPD/MXD1/PMEPA1/SLC2A3/IL1A/STAT5A/PTPRE/VEGFA/SGK1/RELA/IRF1/BIRC3/RELB/IL6ST/CFLAR/SERPINE1/IL15RA/ZC3H12A/YRDC/IL12B/CD83/PLPP3/TNFAIP6/DNAJB4/EGR1/IFNGR2/SMAD3/I…	198
Plasma down	APICAL JUNCTION	195/4019	200/4383	0.000498865	0.0124716	0.010765	ACTG2/MAP4K2/PLCG1/KCNH2/TGFBI/TMEM8B/MYL9/LDLRAP1/NLGN2/TRAF1/SHROOM2/TJP1/NRTN/TNFRSF11B/ACTC1/MAP3K20/CDH11/SKAP2/ICAM5/EPB41L2/CADM2/NF1/CLDN8/ACTN1/FSCN1/RASA1/IRS1/PARD6G/TAOK2/PFN1/PARVA/ACTB/PBX2/CLDN7/ITGB1/ADRA1B/CDH4/NFASC/CLDN4/INPPL1/PCDH1/ACTN4/CLDN6/ITGA9/NECTIN1/TSC1/RSU1/ITGA2/MYH10/GAMT/ADAM23/NF2/NECTIN2/COL17A1/CD276/AKT3/VWF/YWHAH/ICAM4/COL16A1/EGFR/AKT2/BMP1/CD34/SHC1/DLG1/C…	195
EVs up	UV RESPONSE DN	135/3001	144/4383	6.15986e-14	3.07993e-12	2.26942e-12	DYRK1A/IGF1R/CDC42BPA/PTPN21/DUSP1/RND3/ADD3/BDNF/RASA2/DLC1/NFIB/LAMC1/CITED2/MAP1B/ATXN1/TOGARAM1/MMP16/AKT3/ATP2B1/VLDLR/TGFBR3/ACVR2A/NIPBL/SNAI2/SYNE1/LTBP1/CDKN1B/CDK13/SDC2/CELF2/PRKCA/IRS1/PTEN/FYN/LPAR1/ATRX/PRKAR2B/TJP1/NR3C1/RUNX1/ADGRL2/ABCC1/SCHIP1/MAP2K5/PLPP3/ARHGEF9/SMAD7/SRI/SCN8A/CAP2/PMP22/APBB2/PDLIM5/PHF3/ERBB2/NOTCH2/INSIG1/VAV2/SIPA1L1/ZMIZ1/ATRN/KALRN/RGS4/CACNA1A/SLC7A1/K…	135
EVs up	TNFA SIGNALING VIA NFKB	160/3001	200/4383	0.000134947	0.00280653	0.00206797	GFPT2/BMP2/MARCKS/DUSP1/EFNA1/KLF9/TSC22D1/INHBA/JUN/IER5/KLF10/NAMPT/FOSL2/ZBTB10/FUT4/KLF4/ATP2B1/CLCF1/TUBB2A/ABCA1/CEBPD/VEGFA/DENND5A/KLF6/NR4A2/EGR3/GEM/PLK2/IL6ST/PDE4B/PLPP3/ID2/ETS2/KYNU/MAP3K8/SOD2/CSF1/IL1A/PDLIM5/NFAT5/RELA/PLAUR/NFKBIA/IL12B/EDN1/OLR1/TRIB1/TNFSF9/REL/TIPARP/NR4A1/TRIP10/MXD1/CXCL11/PHLDA1/SNN/SLC2A3/F3/TNFAIP3/DDX58/FOSL1/MAFF/MSC/RCAN1/NINJ1/IL1B/DUSP4/RHOB/ICAM1/P…	160
EVs up	EPITHELIAL MESENCHYMAL TRANSITION	159/3001	200/4383	0.000256982	0.00280653	0.00206797	COL6A2/WIPF1/SLIT2/BDNF/LOX/INHBA/JUN/MFAP5/LAMC1/CDH6/TGFBR3/FN1/TNFRSF11B/COL4A1/CALU/SNAI2/SGCB/FERMT2/VEGFA/CDH11/PTHLH/BASP1/CADM1/PFN2/GEM/MYLK/MEST/LRP1/ID2/LRRC15/SERPINE2/CAP2/ITGB1/IL15/PMP22/MMP2/QSOX1/NOTCH2/PLAUR/ECM2/SLC6A8/CXCL12/TGM2/BMP1/IL32/VIM/SGCD/RGS4/PDGFRB/TNFAIP3/SFRP1/PDLIM4/GJA1/CTHRC1/FSTL3/CD59/ITGB3/RHOB/PTX3/PRRX1/ELN/MMP3/SDC1/LAMC2/DST/ITGAV/SERPINE1/SDC4/THBS1/FA…	159
EVs up	PROTEIN SECRETION	81/3001	96/4383	0.000265895	0.00280653	0.00206797	SSPN/DOP1A/ARFGAP3/MAPK1/ANP32E/NAPG/RPS6KA3/STX16/LMAN1/TMX1/PAM/EGFR/TMED2/BET1/CTSC/ADAM10/ABCA1/IGF2R/SCAMP1/VAMP4/KIF1B/AP2B1/SNAP23/AP1G1/ATP1A1/USO1/SNX2/ARFGEF1/PPT1/ARFGEF2/VPS45/RAB22A/GALC/RER1/ARCN1/SH3GL2/DST/GNAS/GOSR2/CLCN3/CLTC/ARFIP1/MON2/RAB5A/AP3S1/ATP7A/VPS4B/LAMP2/AP2S1/TOM1L1/RAB14/STAM/SCAMP3/CAV2/BNIP3/STX12/VAMP3/GOLGA4/AP3B1/YIPF6/M6PR/ATP6V1H/OCRL/SGMS1/DNM1L/AP2M1/TSG1…	81
EVs up	ANDROGEN RESPONSE	84/3001	100/4383	0.000280653	0.00280653	0.00206797	NKX3-1/ARID5B/SRP19/PTPN21/ELL2/SLC38A2/TSC22D1/RPS6KA3/SCD/ELK4/SRF/GNAI3/LMAN1/ZBTB10/VAPA/DNAJB9/NCOA4/GUCY1A1/UBE2I/MAF/ELOVL5/PGM3/UBE2J1/ALDH1A3/PDLIM5/HERC3/KRT8/INSIG1/TMEM50A/ZMIZ1/B2M/APPBP2/SORD/NDRG1/GPD1L/STEAP4/CDK6/LIFR/KLK3/CAMKK2/FKBP5/CENPN/SGK1/ABHD2/KLK2/ITGAV/CDC14B/HMGCS1/ABCC4/MAK/DBI/ACSL3/XRCC5/AKAP12/SLC26A2/ANKH/FADS1/HPGD/HMGCR/HOMER2/IQGAP2/SAT1/B4GALT1/SMS/MAP7/CCND1…	84
EVs up	TGF BETA SIGNALING	47/3001	54/4383	0.00137173	0.0114311	0.0084229	FNTA/SMURF2/BMP2/TRIM33/NOG/KLF10/PPM1A/XIAP/APC/NCOR2/RHOA/ARID4B/HIPK2/TJP1/SMURF1/ID2/SMAD7/SPTBN1/UBE2D3/LTBP2/SMAD1/SERPINE1/THBS1/WWTR1/SLC20A1/MAP3K7/BMPR2/CTNNB1/FKBP1A/TGFBR1/CDH1/SMAD3/IFNGR2/PPP1CA/CDK9/BCAR3/TGIF1/TGFB1/RAB31/SKIL/PMEPA1/SKI/ID1/ACVR1/JUNB/FURIN/SMAD6	47
EVs up	ESTROGEN RESPONSE EARLY	155/3001	200/4383	0.00251831	0.0179879	0.0132542	IGF1R/AFF1/ESRP2/FAM102A/SLC2A1/AMFR/ADD3/TOB1/REEP1/PMAIP1/DLC1/NRIP1/KLF10/FARP1/NPY1R/RET/UGCG/KLF4/NCOR2/CALCR/ABAT/ARL3/BCL11B/BCL2/EGR3/LRIG1/MYB/IL6ST/ELOVL5/RPS6KA2/WWC1/SLC1A1/SLC16A1/TMEM164/ENDOD1/MAST4/ASB13/TPD52L1/NADSYN1/MLPH/HR/ADCY9/NXT1/KRT8/SLC22A5/CXCL12/SEC14L2/SLC24A3/TGM2/ABLIM1/TIPARP/PDLIM3/FLNB/MED13L/TTC39A/SLC7A5/SLC7A2/GJA1/CBFA2T3/MYBL1/TFAP2C/CELSR1/RARA/THSD4/ELOVL…	155
EVs up	HEME METABOLISM	154/3001	200/4383	0.00415227	0.0230682	0.0169976	SLC2A1/KDM7A/SYNJ1/ELL2/MARCHF8/RANBP10/RNF19A/SLC7A11/NUDT4/CDC27/NCOA4/ARL2BP/MBOAT2/SLC30A10/CAST/DCUN1D1/VEZF1/KAT2B/IGSF3/NR3C1/CA2/MXI1/CDR2/LPIN2/KLF3/SLC25A37/PRDX2/ENDOD1/SPTB/HEBP1/PICALM/HTATIP2/TRIM58/TMCC2/TYR/CTNS/PGLS/HAGH/DAAM1/SLC6A8/CA1/MKRN1/CTSE/ANK1/TFRC/GYPA/SELENBP1/HBD/SLC10A3/TMEM9B/BMP2K/TNS1/EZH1/ERMAP/TAL1/SLC66A2/TNRC6B/RBM38/OSBP2/XPO7/BACH1/DCAF10/GDE1/SLC22A4/BTG2/…	154
EVs up	KRAS SIGNALING UP	154/3001	200/4383	0.00415227	0.0230682	0.0169976	DCBLD2/GABRA3/GFPT2/BMP2/EPB41L3/IL33/CBL/ADAMDEC1/EVI5/MMD/INHBA/RELN/SNAP25/SNAP91/ETV5/MAP3K1/STRN/NAP1L2/MYCN/KLF4/GUCY1A1/FGF9/MTMR10/ETS1/PRDM1/PTBP2/CA2/EMP1/ID2/WDR33/NIN/AVL9/ALDH1A3/TSPAN13/USP12/AKT2/LAPTM5/PLEK2/MALL/ADAM8/TOR1AIP2/PLAUR/GPRC5B/SCG5/GALNT3/TRIB1/TRIB2/GPNMB/IGF2/PLVAP/ETV1/KCNN4/TNFAIP3/IL2RG/PIGR/SPRY2/NGF/ALDH1A2/SPON1/TNFRSF1B/IL1B/CTSS/DNMBP/EPHB2/MPZL2/ARG1/PRRX1…	154
EVs down	UV RESPONSE DN	98/1866	144/4383	3.17854e-10	1.58927e-08	1.27142e-08	MMP16/CELF2/YTHDC1/TOGARAM1/PRKCA/ATP2B4/NEK7/DLC1/NR3C1/COL1A2/BHLHE40/HAS2/IGF1R/SFMBT1/SMAD7/MAP1B/NRP1/ATRX/ICA1/DLG1/ACVR2A/AKT3/SYNJ2/MGLL/CDON/KCNMA1/MET/ARHGEF9/CACNA1A/SPOP/FZD2/SDC2/VLDLR/PIAS3/NFIB/ATXN1/PPARG/INSIG1/CAV1/CDK13/NOTCH2/COL11A1/ANXA4/SRI/PDLIM5/DAB2/NFKB1/IRS1/TGFBR2/MTA1/GCNT1/DYRK1A/ATP2B1/CDC42BPA/RBPMS/RND3/PDGFRB/ATRN/ATP2C1/APBB2/BCKDHB/ERBB2/MAPK14/PTEN/PTPN21/PRD…	98
EVs down	G2M CHECKPOINT	115/1866	200/4383	9.85019e-06	0.000227576	0.000182061	GSPT1/SRSF1/DMD/XPO1/TFDP1/CCNT1/YTHDC1/CUL1/NUP50/SRSF2/SRSF10/PURA/CCND1/HNRNPD/SLC12A2/SMC4/PRMT5/H2AX/ARID4A/ATRX/KIF5B/KNL1/NUSAP1/SMC1A/ODC1/CCNF/PAFAH1B1/TRA2B/G3BP1/MAP3K20/SYNCRIP/MEIS2/CCNA2/SS18/MARCKS/NOTCH2/HMGN2/LBR/TMPO/CUL5/CUL4A/E2F3/PRPF4B/DKC1/E2F4/FOXN3/ILF3/CKS2/MEIS1/RACGAP1/MCM6/DR1/NOLC1/EFNA5/CENPE/CDK4/KIF20B/TTK/BUB1/H2AZ1/MTF2/MAPK14/KIF15/LIG3/NUP98/NASP/RAD54L/HNRNPU…	115
EVs down	MITOTIC SPINDLE	114/1866	199/4383	1.36545e-05	0.000227576	0.000182061	RASA1/RICTOR/ARF6/SORBS2/CCDC88A/WASF2/STK38L/BCL2L11/NEDD9/KIF1B/DYNLL2/SMC4/PLEKHG2/ALS2/CEP57/ARHGAP27/KIF5B/ARHGEF3/DLG1/TUBGCP5/ARFGEF1/AKAP13/NUSAP1/SMC1A/EPB41/PAFAH1B1/RAPGEF6/PPP4R2/SPTBN1/LATS1/CD2AP/SOS1/FGD4/SSH2/MARCKS/NOTCH2/PDLIM5/NF1/CEP192/WASL/MAPRE1/PREX1/ACTN4/NET1/ALMS1/CDC42BPA/HOOK3/RACGAP1/FARP1/CLIP1/ITSN1/NIN/ARHGAP29/PKD2/CENPE/PCM1/KIF20B/TTK/BUB1/DLGAP5/KIF15/DOCK4/TU…	114
EVs down	ANDROGEN RESPONSE	61/1866	100/4383	0.000134173	0.00167717	0.00134173	HMGCS1/ZBTB10/HERC3/ACSL3/CCND1/ARID5B/ELOVL5/SGK1/SLC26A2/FADS1/NDRG1/STK39/CDK6/ELL2/ADAMTS1/APPBP2/SORD/INSIG1/STEAP4/HOMER2/SLC38A2/ITGAV/PDLIM5/MAF/TNFAIP8/HMGCR/PIAS1/GPD1L/LMAN1/DBI/GNAI3/ABHD2/LIFR/PMEPA1/PTPN21/IDI1/ABCC4/CDC14B/UBE2I/ZMIZ1/H1-0/PGM3/NGLY1/B4GALT1/PLPP1/RPS6KA3/GSR/IQGAP2/FKBP5/AKAP12/GUCY1A1/SEC24D/SRF/RAB4A/TMPRSS2/MERTK/UAP1/HPGD/ALDH1A3/NCOA4/ELK4	61
EVs down	TGF BETA SIGNALING	34/1866	54/4383	0.00190416	0.0190416	0.0152333	XIAP/SMURF2/SMAD7/TGFBR1/SKIL/SPTBN1/ARID4B/PPM1A/KLF10/TRIM33/BMPR2/CTNNB1/UBE2D3/SMAD1/ACVR1/SLC20A1/HIPK2/PMEPA1/CDK9/APC/ENG/SERPINE1/SMAD3/TJP1/NOG/FKBP1A/FNTA/LEFTY2/LTBP2/BMPR1A/NCOR2/MAP3K7/CDKN1C/BMP2	34
EVs down	MTORC1 SIGNALING	104/1866	200/4383	0.00376239	0.0313532	0.0250826	TCEA1/HMGCS1/RDH11/TXNRD1/PDK1/BCAT1/MTHFD2/MTHFD2L/ACSL3/ERO1A/ACTR3/NFIL3/M6PR/BHLHE40/EDEM1/UCHL5/ELOVL5/DHFR/RRM2/STARD4/CANX/FADS1/GGA2/SLC6A6/ACACA/PNO1/UFM1/SLC7A11/CCNF/CYB5B/DDIT4/ME1/VLDLR/ETF1/SORD/INSIG1/FGL2/NUFIP1/SKAP2/PSMC2/UBE2D3/PSMA4/BTG2/HMGCR/RAB1A/PSMG1/USO1/HK2/ATP2A2/PLOD2/NUP205/AK4/PSAT1/CD9/ITGB2/GSK3B/PSMC6/HSPA4/BUB1/IDH1/CTH/TES/IFRD1/IDI1/PSMB5/EGLN3/ADIPOR2/FDXR/EL…	104
EVs down	PROTEIN SECRETION	54/1866	96/4383	0.00439925	0.0314232	0.0251386	RAB22A/AP1G1/M6PR/VAMP4/KIF1B/STX16/LAMP2/ATP6V1H/ICA1/GOSR2/ARFGEF1/ATP7A/AP2B1/TMED2/RAB14/CLCN3/ARCN1/CAV2/SCAMP1/ANP32E/MAPK1/SGMS1/LMAN1/MON2/RAB9A/USO1/TMX1/STX12/OCRL/VPS4B/ABCA1/SEC22B/RAB5A/AP3B1/SEC31A/DNM1L/SH3GL2/DST/CD63/CTSC/EGFR/SNX2/TSG101/RPS6KA3/TOM1L1/SSPN/TMED10/SEC24D/ARFIP1/VPS45/ADAM10/PAM/GOLGA4/RAB2A	54
EVs down	NOTCH SIGNALING	21/1866	32/4383	0.00703885	0.0439928	0.0351943	PRKCA/CUL1/SKP1/CCND1/FZD5/JAG1/DLL1/FZD7/WNT5A/NOTCH2/HES1/NOTCH1/ST3GAL6/DTX4/WNT2/MAML2/PSEN2/TCF7L2/ARRB1/FBXW11/NOTCH3	21
Plasma specific	UV RESPONSE DN	101/2018	144/4383	2.43601e-09	1.218e-07	9.4876e-08	ATRX/YTHDC1/BCKDHB/KCNMA1/NRP1/PRKCA/PTPN21/GCNT1/PDGFRB/SFMBT1/FZD2/RBPMS/ACVR2A/SDC2/VLDLR/PIAS3/NFIB/ATXN1/PPARG/INSIG1/CAV1/CDK13/NOTCH2/COL11A1/MMP16/NEK7/ANXA4/SRI/PDLIM5/CELF2/DAB2/NFKB1/IRS1/TGFBR2/HAS2/MTA1/AKT3/DYRK1A/ATP2B1/CDC42BPA/NR3C1/RND3/ATRN/ATP2C1/APBB2/MAP1B/ERBB2/MAPK14/PTEN/PRDM2/ZMIZ1/ARHGEF9/LAMC1/NIPBL/SLC7A1/SYNE1/CAP2/AGGF1/LDLR/SCN8A/ICA1/TOGARAM1/PHF3/PRKAR2B/RASA2/LT…	101
Plasma specific	G2M CHECKPOINT	120/2018	200/4383	3.47351e-05	0.000868377	0.00067642	XPO1/KPNB1/ATRX/YTHDC1/MAP3K20/BRCA2/ODF2/HNRNPU/SRSF1/NSD2/TNPO2/CDC25A/SMC1A/HIRA/HMGN2/E2F2/NUP98/CENPF/MKI67/G3BP1/SYNCRIP/TRA2B/MEIS2/NUP50/ARID4A/CCNA2/SS18/MARCKS/NOTCH2/LBR/TMPO/CUL5/SLC12A2/CUL4A/E2F3/PRPF4B/DKC1/E2F4/FOXN3/ILF3/CKS2/SRSF10/MEIS1/RACGAP1/MCM6/PURA/DR1/NOLC1/EFNA5/CENPE/CDK4/KIF20B/TTK/BUB1/H2AZ1/MTF2/MAPK14/KIF15/LIG3/SMC4/PAFAH1B1/KIF5B/CCNF/SLC7A1/BARD1/MCM5/CDKN3/CUL1…	120
Plasma specific	MITOTIC SPINDLE	117/2018	199/4383	0.000149071	0.00248451	0.0019353	TUBGCP3/KIF3B/DST/MYH9/TRIO/BRCA2/BCAR1/PCGF5/ARHGEF12/SEPTIN9/DYNC1H1/SMC1A/ARHGAP5/MARK4/FSCN1/APC/STK38L/CENPF/PPP4R2/RICTOR/SPTBN1/LATS1/CCDC88A/CD2AP/SOS1/FGD4/SSH2/MARCKS/NOTCH2/PDLIM5/NF1/CEP192/RASA1/WASL/MAPRE1/RAPGEF6/PREX1/ACTN4/NET1/ALMS1/CDC42BPA/HOOK3/RACGAP1/FARP1/ARHGEF3/CLIP1/ITSN1/NIN/BCL2L11/ARF6/ARHGAP29/PKD2/ALS2/CENPE/PCM1/KIF20B/TTK/BUB1/DLGAP5/KIF1B/KIF15/DOCK4/SMC4/ARFGEF…	117
Plasma specific	TGF BETA SIGNALING	38/2018	54/4383	0.000239879	0.00299849	0.00233567	FURIN/HIPK2/TGFBR1/PMEPA1/APC/SKIL/SPTBN1/ARID4B/PPM1A/KLF10/TRIM33/XIAP/BMPR2/CTNNB1/UBE2D3/SMURF2/SMAD1/ACVR1/SLC20A1/ID2/TGIF1/BMP2/CDK9/ENG/SERPINE1/SMAD3/TJP1/NOG/FKBP1A/FNTA/LEFTY2/LTBP2/BMPR1A/THBS1/SMAD6/SMAD7/SMURF1/CDKN1C	38
Plasma specific	HEDGEHOG SIGNALING	27/2018	36/4383	0.000378129	0.00378129	0.00294543	MYH9/NRP1/CDK6/HEY2/RTN1/AMOT/VLDLR/NRCAM/PTCH1/NF1/RASA1/HEY1/CDK5R1/CELSR1/PLG/TLE3/UNC5C/DPYSL2/ETS2/OPHN1/NRP2/CNTFR/PML/GLI1/CRMP1/TLE1/VEGFA	27
Plasma specific	PROTEIN SECRETION	60/2018	96/4383	0.00076717	0.00609633	0.00474872	DST/CLCN3/YKT6/RER1/TMX1/PAM/TMED2/RAB14/RAB22A/ARCN1/CAV2/SCAMP1/ANP32E/MAPK1/SGMS1/LMAN1/MON2/RAB9A/USO1/STX12/OCRL/VPS4B/ABCA1/SEC22B/RAB5A/AP3B1/SEC31A/DNM1L/SH3GL2/ATP7A/KIF1B/ARFGEF1/STX16/SSPN/TSPAN8/VAMP7/STX7/TMED10/ICA1/CD63/CTSC/EGFR/ATP6V1H/AP2B1/CLN5/TSG101/RPS6KA3/TOM1L1/SEC24D/LAMP2/ARFIP1/VPS45/ADAM10/SNAP23/ARFGEF2/YIPF6/M6PR/SCRN1/AP2M1/RAB2A	60
Plasma specific	ANDROGEN RESPONSE	62/2018	100/4383	0.000853486	0.00609633	0.00474872	RAB4A/SRF/TMPRSS2/SLC26A2/KLK3/PMEPA1/PTPN21/ACSL3/SMS/GPD1L/CDK6/ELL2/ADAMTS1/APPBP2/ARID5B/SORD/INSIG1/STEAP4/HOMER2/SLC38A2/ITGAV/PDLIM5/MAF/ZBTB10/TNFAIP8/HMGCR/PIAS1/LMAN1/DBI/GNAI3/ELOVL5/ABHD2/LIFR/IDI1/ABCC4/CDC14B/UBE2I/ZMIZ1/TSC22D1/SCD/H1-0/PGM3/NGLY1/B4GALT1/PLPP1/PA2G4/SELENOP/RPS6KA3/GSR/IQGAP2/FKBP5/AKAP12/GUCY1A1/SEC24D/MERTK/UAP1/VAPA/ELK4/CENPN/SRP19/INPP4B/NCOA4	62
Plasma specific	HYPOXIA	111/2018	200/4383	0.0037922	0.0237013	0.018462	PDGFB/STC2/BRS3/MYH9/HAS1/SDC4/AMPD3/BCL2/EFNA3/GYS1/PRKCA/JMJD6/HOXB9/CAVIN1/ETS1/ENO2/ZFP36/ZNF292/NCAN/PAM/RORA/NEDD4L/DDIT4/SDC2/RRAGD/VLDLR/TPBG/CAV1/KLF7/MAP3K1/RBPJ/CCNG2/GPC4/DCN/EXT1/BTG1/XPNPEP1/KLHL24/KLF6/DTNA/CP/NR3C1/HK2/IRS2/AK4/TGFBI/ATP7A/TNFAIP3/PLAC8/TES/STBD1/FOXO3/STC1/GLRX/IGFBP3/COL5A1/PIM1/ENO3/ATF3/SLC2A3/EGFR/TIPARP/CHST2/SERPINE1/SLC2A1/BNIP3L/CDKN1A/SLC6A6/KIF5A/PPARGC…	111
Plasma specific	APOPTOSIS	90/2018	161/4383	0.00670484	0.0372491	0.0290151	GSTM1/GADD45B/BIK/SATB1/MCL1/APP/LMNA/PEA15/PSEN2/ENO2/GNA15/PDGFRB/DIABLO/FAS/BCL2L2/LEF1/ETF1/BAX/CAV1/BTG3/PPP3R1/EREG/BCL10/XIAP/DCN/WEE1/CTNNB1/CD44/BTG2/SLC20A1/EGR3/PTK2/PLPPR4/HMGB2/VDAC2/IRF1/BCL2L11/DNM1L/DNAJC3/TGFB2/PMAIP1/CD38/ERBB2/CTH/EMP1/CD69/CYLD/ROCK1/ERBB3/BRCA1/TNF/BMP2/NEDD9/TNFSF10/SOD2/H1-0/FDXR/PAK1/ATF3/TNFRSF12A/DPYD/BNIP3L/CDKN1A/BCL2L1/GSR/JUN/RHOB/PSEN1/CASP3/CDC25B/…	90
Plasma specific	NOTCH SIGNALING	22/2018	32/4383	0.00783598	0.0391799	0.0305191	PRKCA/PSEN2/ARRB1/HEYL/FZD7/WNT5A/NOTCH2/HES1/NOTCH1/CUL1/ST3GAL6/DTX4/SKP1/WNT2/APH1A/MAML2/FZD5/JAG1/TCF7L2/DTX1/FBXW11/NOTCH3	22
Plasma specific	EPITHELIAL MESENCHYMAL TRANSITION	109/2018	200/4383	0.00865293	0.0393315	0.0306372	DST/BASP1/WIPF1/GADD45B/SDC4/DPYSL3/PMEPA1/GREM1/LRP1/FBLN1/CDH2/ENO2/PDGFRB/FAS/EDIL3/CALD1/SNTB1/WNT5A/NOTCH2/COL11A1/ABI3BP/MEST/ITGAV/DCN/DAB2/CD44/VIM/FSTL1/CDH6/TNC/CADM1/GLIPR1/SERPINE2/ITGB5/ITGB1/PLOD2/TPM1/PTX3/SPP1/TGFBI/FAP/FERMT2/TNFAIP3/IL15/SPOCK1/FGF2/LAMC1/SPARC/QSOX1/PTHLH/POSTN/ECM2/ID2/CAP2/COL8A2/THBS2/FBN2/IGFBP3/COL5A1/BMP1/FN1/COL4A1/TAGLN/TNFRSF12A/EFEMP2/COL1A2/LAMA1/SER…	109
EVs specific	UV RESPONSE DN	140/3592	144/4383	1.12595e-08	5.62977e-07	4.26678e-07	CITED2/PRKCE/RXRA/CDK13/PIAS3/SCAF8/SDC2/ZMIZ1/NR3C1/COL1A1/PDLIM5/ERBB2/ICA1/SLC7A1/TGFBR3/CDON/ARHGEF9/ANXA2/TJP1/PIK3CD/BDNF/PTPN21/DUSP1/RND3/ADD3/RASA2/DLC1/NFIB/LAMC1/MAP1B/ATXN1/TOGARAM1/MMP16/AKT3/ATP2B1/VLDLR/ACVR2A/NIPBL/SNAI2/SYNE1/LTBP1/CDKN1B/CELF2/PRKCA/IRS1/PTEN/FYN/LPAR1/ATRX/PRKAR2B/RUNX1/ADGRL2/ABCC1/SCHIP1/MAP2K5/PLPP3/SMAD7/SRI/SCN8A/CAP2/PMP22/APBB2/PHF3/NOTCH2/INSIG1/VAV2/SI…	140
EVs specific	TNFA SIGNALING VIA NFKB	183/3592	200/4383	7.90147e-05	0.00197537	0.00149712	NAMPT/NFKBIA/TSC22D1/KLF4/NR4A3/STAT5A/MAP3K8/CCL2/B4GALT5/PDLIM5/MAFF/TNIP1/CEBPB/TRAF1/DDX58/SIK1/CXCL1/SNN/CXCL2/CLCF1/FOSB/MARCKS/DUSP1/EFNA1/KLF9/INHBA/JUN/IER5/KLF10/FOSL2/ZBTB10/FUT4/ATP2B1/TUBB2A/ABCA1/CEBPD/VEGFA/DENND5A/KLF6/NR4A2/EGR3/GEM/PLK2/IL6ST/PDE4B/PLPP3/ID2/ETS2/KYNU/SOD2/CSF1/IL1A/NFAT5/RELA/PLAUR/IL12B/PTGS2/CFLAR/MSC/RHOB/KDM6B/MXD1/TRIP10/B4GALT1/PHLDA1/TRIB1/NFIL3/BCL6/TNF…	183
EVs specific	ESTROGEN RESPONSE EARLY	180/3592	200/4383	0.000925416	0.0151464	0.0114794	WWC1/AKAP1/KLF4/TMEM164/CYP26B1/NCOR2/ABAT/SYT12/RET/RHOD/PTGES/TSKU/PAPSS2/KLK10/ENDOD1/CXCL12/TGM2/OVOL2/SLC37A1/IGFBP4/DHCR7/RARA/KAZN/CBFA2T3/AMFR/ADD3/TOB1/REEP1/PMAIP1/DLC1/NRIP1/KLF10/FARP1/NPY1R/UGCG/CALCR/ARL3/BCL11B/BCL2/EGR3/LRIG1/MYB/IL6ST/ELOVL5/RPS6KA2/SLC1A1/SLC16A1/MAST4/ASB13/TPD52L1/NADSYN1/MLPH/HR/FAM102A/ADCY9/NXT1/SLC2A1/KRT8/SLC22A5/SEC14L2/SLC24A3/ELOVL2/AR/RASGRP1/THSD4/B4…	180
EVs specific	ANDROGEN RESPONSE	93/3592	100/4383	0.00121171	0.0151464	0.0114794	TSC22D1/UAP1/HMGCR/HMGCS1/STK39/SLC38A2/ZMIZ1/PDLIM5/SPDEF/H1-0/PTPN21/ELL2/RPS6KA3/SCD/ELK4/SRF/GNAI3/LMAN1/ZBTB10/VAPA/DNAJB9/NCOA4/GUCY1A1/UBE2I/MAF/ELOVL5/PGM3/UBE2J1/ARID5B/ALDH1A3/HERC3/KRT8/INSIG1/TMEM50A/SRP19/SORD/KLK2/ACSL3/INPP4B/ITGAV/B4GALT1/CAMKK2/TNFAIP8/RAB4A/ANKH/SLC26A2/FADS1/FKBP5/HOMER2/GPD1L/DHCR24/APPBP2/ABCC4/CCND1/TMPRSS2/CDC14B/CDK6/ADAMTS1/SPCS3/HPGD/IQGAP2/ABHD2/TPD52/C…	93
EVs specific	TGF BETA SIGNALING	52/3592	54/4383	0.00168879	0.015683	0.0118861	ARID4B/CDKN1C/PPM1A/NCOR2/LTBP2/FURIN/SMURF1/TJP1/TRIM33/NOG/KLF10/XIAP/APC/SMURF2/RHOA/HIPK2/ID2/SMAD7/SPTBN1/UBE2D3/BMPR2/CTNNB1/SLC20A1/HDAC1/RAB31/FKBP1A/LEFTY2/SKIL/TGFBR1/THBS1/BMP2/BMPR1A/CDH1/SMAD1/ACVR1/PMEPA1/PPP1R15A/FNTA/WWTR1/SERPINE1/IFNGR2/BCAR3/JUNB/SMAD3/PPP1CA/CDK9/TGIF1/ID1/SMAD6/TGFB1/SKI/MAP3K7	52
EVs specific	APICAL JUNCTION	179/3592	200/4383	0.00188196	0.015683	0.0118861	CDH11/CADM2/ACTC1/SLIT2/PTPRC/GNAI1/NECTIN4/ACTG2/MAP4K2/PLCG1/KCNH2/TGFBI/TMEM8B/MYL9/LDLRAP1/NLGN2/TRAF1/SHROOM2/TJP1/NRTN/MSN/PPP2R2C/CDH8/CDH6/NFASC/PTK2/AKT3/EGFR/TNFRSF11B/LIMA1/CD274/NEGR1/DSC3/IRS1/PTEN/SHC1/NECTIN1/SGCE/PKD1/NF1/TIAL1/FSCN1/MPP5/ITGB1/CNTN1/AKT2/MMP2/TUBG1/PBX2/CTNND1/PCDH1/MAPK13/INSIG1/LAYN/VAV2/CD34/ITGA10/WASL/CD86/THY1/JAM3/SPEG/PIK3CB/B4GALT1/AMIGO1/COL9A1/TSC1/HAD…	179
EVs specific	KRAS SIGNALING UP	178/3592	200/4383	0.00363731	0.0259808	0.0196907	SPRY2/KLF4/RELN/USH1C/TSPAN7/NAP1L2/LAT2/ADAM17/VWA5A/PIGR/TRAF1/GLRX/PLVAP/TOR1AIP2/SERPINA3/DNMBP/MAFB/FLT4/EVI5/MMD/INHBA/SNAP25/SNAP91/ETV5/MAP3K1/STRN/MYCN/DCBLD2/GUCY1A1/FGF9/MTMR10/ETS1/PRDM1/CBL/PTBP2/CA2/EMP1/ID2/WDR33/NIN/AVL9/ALDH1A3/TSPAN13/USP12/AKT2/LAPTM5/PLEK2/MALL/ADAM8/PLAUR/GPRC5B/SCG5/PTGS2/SCN1B/KIF5C/ETV1/TRIB1/ABCB1/CIDEA/ANKH/SLPI/ST6GAL1/IL10RA/PRKG2/HDAC9/IL7R/EPB41L3/PT…	178
EVs specific	PROTEIN SECRETION	88/3592	96/4383	0.00553529	0.0345956	0.0262198	M6PR/DNM1L/ADAM10/STX16/AP2B1/AP2M1/ICA1/SCAMP3/LAMP2/RPS6KA3/LMAN1/TMX1/PAM/EGFR/TMED2/BET1/CTSC/ABCA1/IGF2R/SCAMP1/VAMP4/KIF1B/SNAP23/ARFGEF1/DST/VPS4B/RAB2A/RAB14/TMED10/STX7/AP1G1/VPS45/ARFIP1/RER1/TOM1L1/STX12/NAPG/MAPK1/RAB22A/OCRL/CLCN3/BNIP3/SSPN/ZW10/VAMP3/SEC22B/GOLGA4/GALC/MON2/TPD52/CAV2/ARCN1/AP3B1/ANP32E/SGMS1/RAB9A/USO1/RAB5A/SEC31A/SH3GL2/ATP1A1/SNX2/ARFGAP3/PPT1/ARFGEF2/YKT6/SEC2…	88
EVs specific	EPITHELIAL MESENCHYMAL TRANSITION	177/3592	200/4383	0.00669639	0.0365253	0.0276823	CDH11/SERPINE2/SLIT2/SERPINH1/DKK1/COL1A1/APLP1/COL8A2/TGFBI/TGFBR3/MYL9/LOXL2/MMP14/CXCL12/TGM2/PPIB/CXCL1/EFEMP2/IGFBP4/BDNF/WIPF1/LOX/INHBA/JUN/MFAP5/LAMC1/CDH6/FN1/TNFRSF11B/COL4A1/CALU/SNAI2/SGCB/FERMT2/VEGFA/PTHLH/BASP1/CADM1/PFN2/GEM/MYLK/MEST/LRP1/ID2/LRRC15/CAP2/ITGB1/IL15/PMP22/MMP2/QSOX1/NOTCH2/PLAUR/ECM2/SLC6A8/DAB2/COL3A1/DST/COL5A1/COL5A2/THY1/EMP3/BGN/RHOB/IL32/EDIL3/CD59/ITGAV/FGF…	177
EVs specific	MITOTIC SPINDLE	176/3592	199/4383	0.00730505	0.0365253	0.0276823	SORBS2/TLK1/PLK1/RANBP9/CKAP5/ESPL1/CNTROB/ARHGEF3/LRPPRC/SAC3D1/NEDD9/PDLIM5/CEP72/RAB3GAP1/ITSN1/SUN2/ABR/ALS2/MID1/SSH2/DYNLL2/MID1IP1/WASF2/SHROOM2/MYO9B/MARCKS/CLIP1/MAPRE1/RASA2/DOCK4/PPP4R2/FARP1/SOS1/TRIO/CDC27/STK38L/APC/LATS1/PKD2/CLASP1/WASF1/ARF6/ANLN/ARHGEF7/FGD4/NF1/ARHGDIA/NCK2/SPTBN1/FSCN1/NIN/SMC4/ARHGAP10/BRCA2/KIF1B/KATNB1/NOTCH2/AKAP13/SYNPO/ARFGEF1/DST/KIFAP3/WASL/RACGAP1/BIN…	176
